# Supplementary material for: An In-Silico Identification of Potential Flavonoids against Kidney Fibrosis Targeting TGFβR-1
Source: MDPI journal article supplement (doi:10.3390/life12111764), 2022-11-02
Supplement: s1 [file s1]

**The Docking Score Data of the Targeting 6 control drug after ADMET screening.**

| <b>S.N.</b> | <b>Pubchem CID</b> | <b>Compound Name</b> | <b>Docking Score</b> |
|-------------|--------------------|----------------------|----------------------|
| 01          | 10096344           | Linagliptin          | -9.074               |
| 02          | 11450633           | Alogliptin           | -8.716               |
| 03          | 3961               | Losartan             | -6.971               |
| 04          | 6918537            | Vildagliptin         | -6.963               |
| 05          | 4369359            | Sitagliptin          | -6.667               |
| 06          | 11243969           | Saxagliptin          | -5.327               |
