# Supplementary material for: An In-Silico Identification of Potential Flavonoids against Kidney Fibrosis Targeting TGFβR-1
Source: MDPI journal article supplement (doi:10.3390/life12111764), 2022-11-02
Supplement: s1 [file s1]

**The Docking Score Data of the Selected Compounds after ADMET and Chemical based Screening:**

| S.N. | Pubchem CID               | Compound Name                                  | Docking Score |
|------|---------------------------|------------------------------------------------|---------------|
| 01   | 72276                     | (-)-Epicatechin                                | -13.585       |
| 02   | 439533                    | Taxifolin                                      | -13.509       |
| 03   | 5281614                   | Fisetin                                        | -13.177       |
| 04   | 9064                      | Cianidanol                                     | -12.994       |
| 05   | 5281672                   | Myricetin                                      | -12.532       |
| 06   | 440735                    | Eriodictyol                                    | -11.951       |
| 07   | 5281807                   | Puerarin                                       | -11.884       |
| 08   | 6B8Y - crystalized_ligand |                                                | -11.880       |
| 09   | 5281612                   | Diosmetin                                      | -11.837       |
| 10   | 5281670                   | Morin                                          | -10.925       |
| 11   | 5281803                   | Pratensein                                     | -10.616       |
| 12   | 5280445                   | Luteolin                                       | -10.506       |
| 13   | 5281654                   | Isorhamnetin                                   | -10.441       |
| 14   | 5280343                   | Quercetin                                      | -10.330       |
| 15   | 5281616                   | Galangin                                       | -10.321       |
| 16   | 31553                     | Silibinin                                      | -10.311       |
| 17   | 5280863                   | Kaempferol                                     | -10.035       |
| 18   | 5281702                   | Tricin                                         | -9.955        |
| 19   | 5280443                   | Apigenin                                       | -9.703        |
| 20   | 932                       | 5,7-Dihydroxy-2-(4-hydroxyphenyl)chroman-4-one | -9.676        |
| 21   | 5281607                   | Chrysin                                        | -9.660        |
| 22   | 5281708                   | Daidzein                                       | -9.325        |

|    |         |                                            |        |
|----|---------|--------------------------------------------|--------|
|    |         |                                            |        |
| 23 | 5281605 | Baicalein                                  | -9.258 |
| 24 | 445154  | Resveratrol                                | -8.552 |
| 25 | 5317750 | Glycitein                                  | -8.368 |
| 26 | 5280961 | Genistein                                  | -7.992 |
| 27 | 136417  | 5-Hydroxy-3,6,7,8,3',4'-hexamethoxyflavone | -7.808 |
| 28 | 72344   | Nobiletin                                  | -7.355 |
| 29 | 5280373 | Biochanin A                                | -7.302 |
| 30 | 5280460 | Scopoletin                                 | -6.940 |
| 31 | 68077   | Tangeretin                                 | -5.386 |
